# Supplementary material for: Can Artificial Intelligence Treat My Urinary Tract Infections?—Evaluation of Health Information Provided by OpenAI™ ChatGPT on Urinary Tract Infections
Source: MDPI journal article supplement (doi:10.3390/siuj5020018), 2024-04-11
Supplement: s1 [file s1]

Archive with 1 entries (1 files):
- siuj-2843119-supplementary.pdf
